# Supplementary material
Source: PubMed Central journal article supplement (PMC3162316)
Supplement: NIHMS292514-supplement-Supplementary_Data.pdf [file NIHMS292514-supplement-Supplementary_Data.pdf]

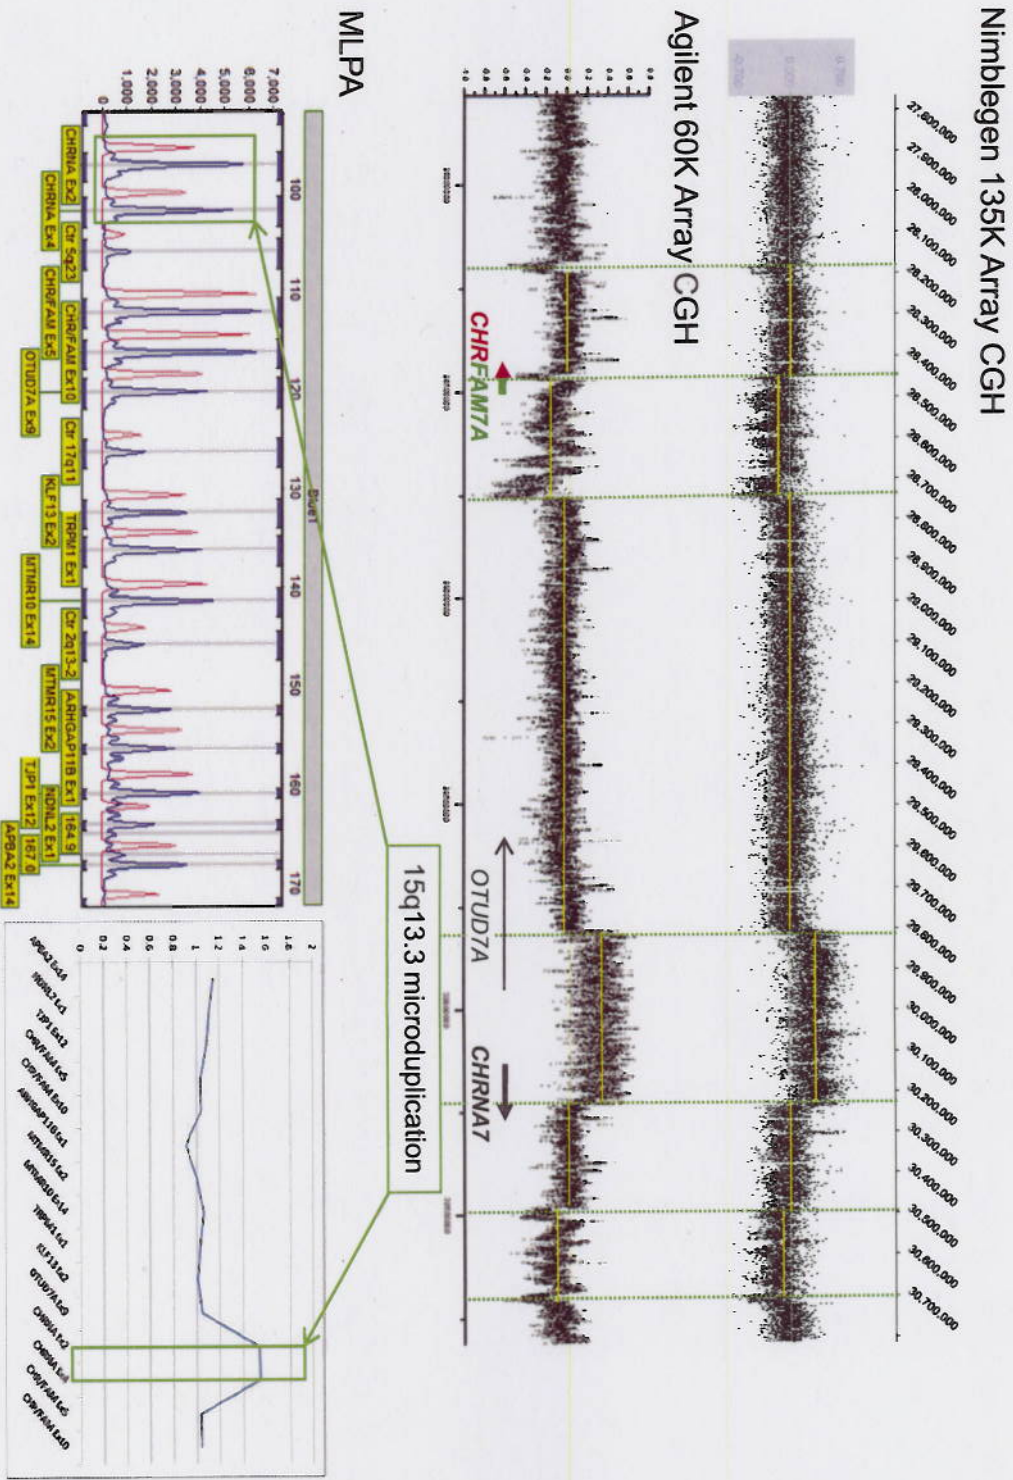

**Supp. Figure S1.** Comparison of Nimblegen aCGH, Agilent aCGH, and MLPA analyses of a case of 15q13.3 class 1 microduplication. The copy number of *CHRNA7* exons 1-4 is doubled. Exons 5-10 are not duplicated due to the presence of *CHRFAM7A* gene on a common ch15 (see Figures 1-2).

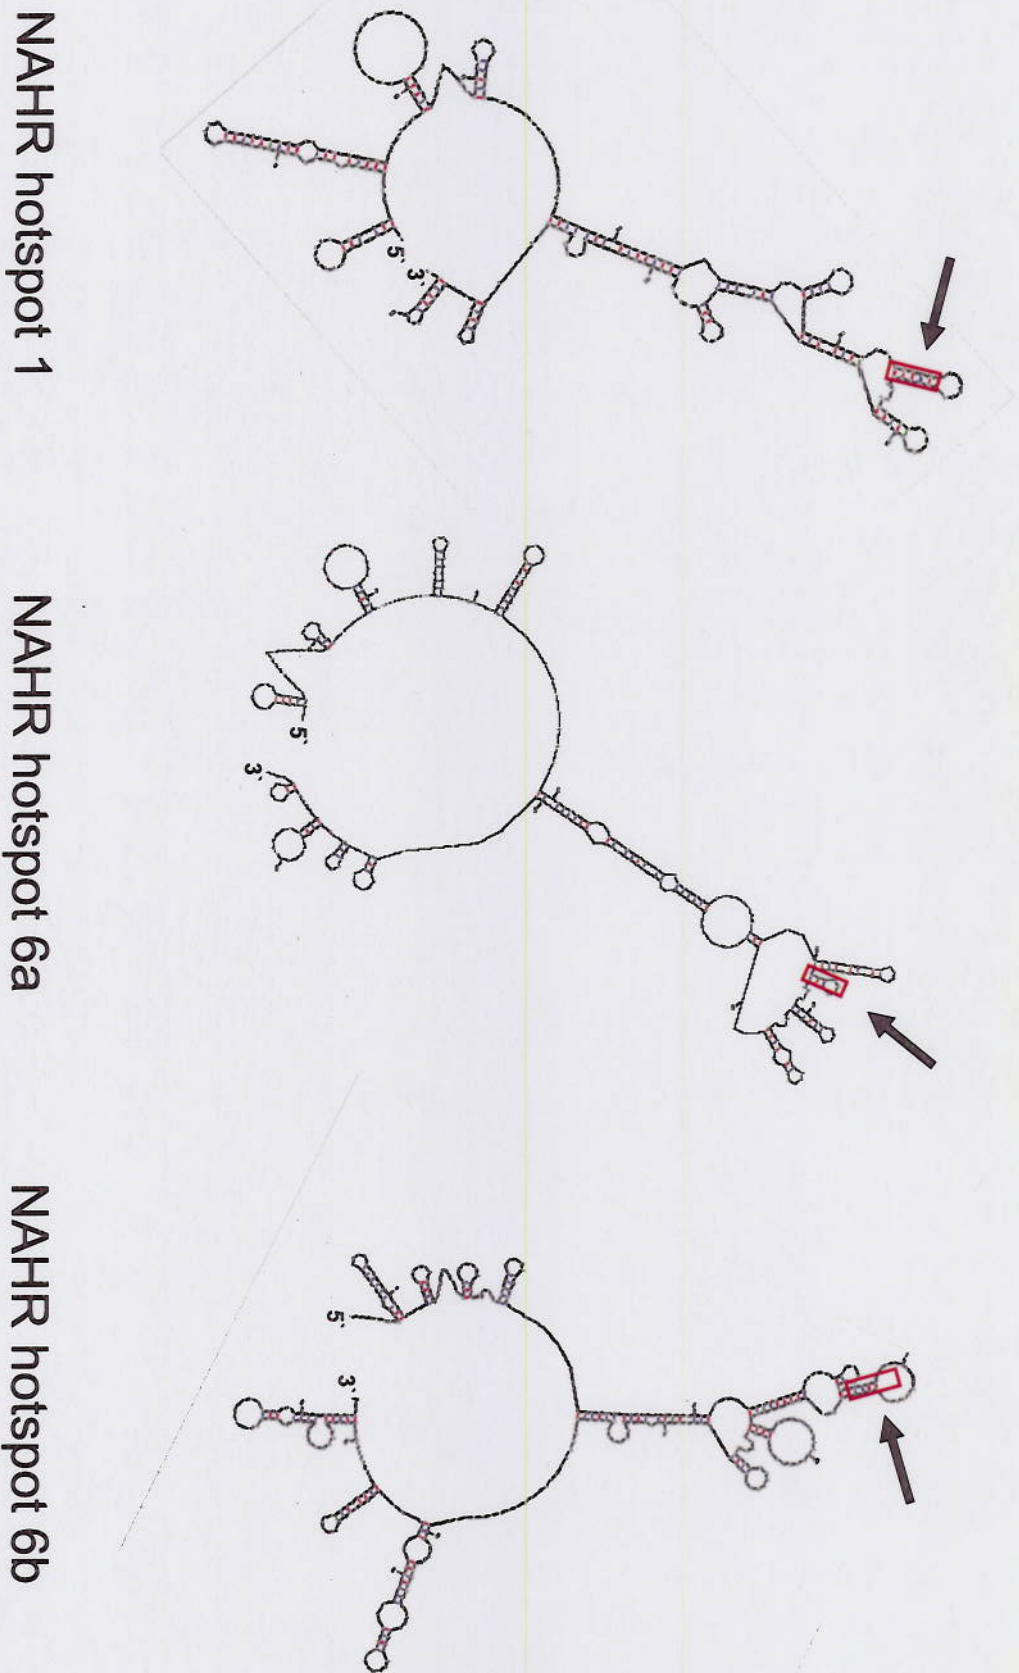

**Supp. Figure S2.** Secondary structures around NAHR breakpoint hotspots in CHRNA7-LCRs. Arrows point at imperfect copies of the CCTCCCT recombination-associated motif (framed).

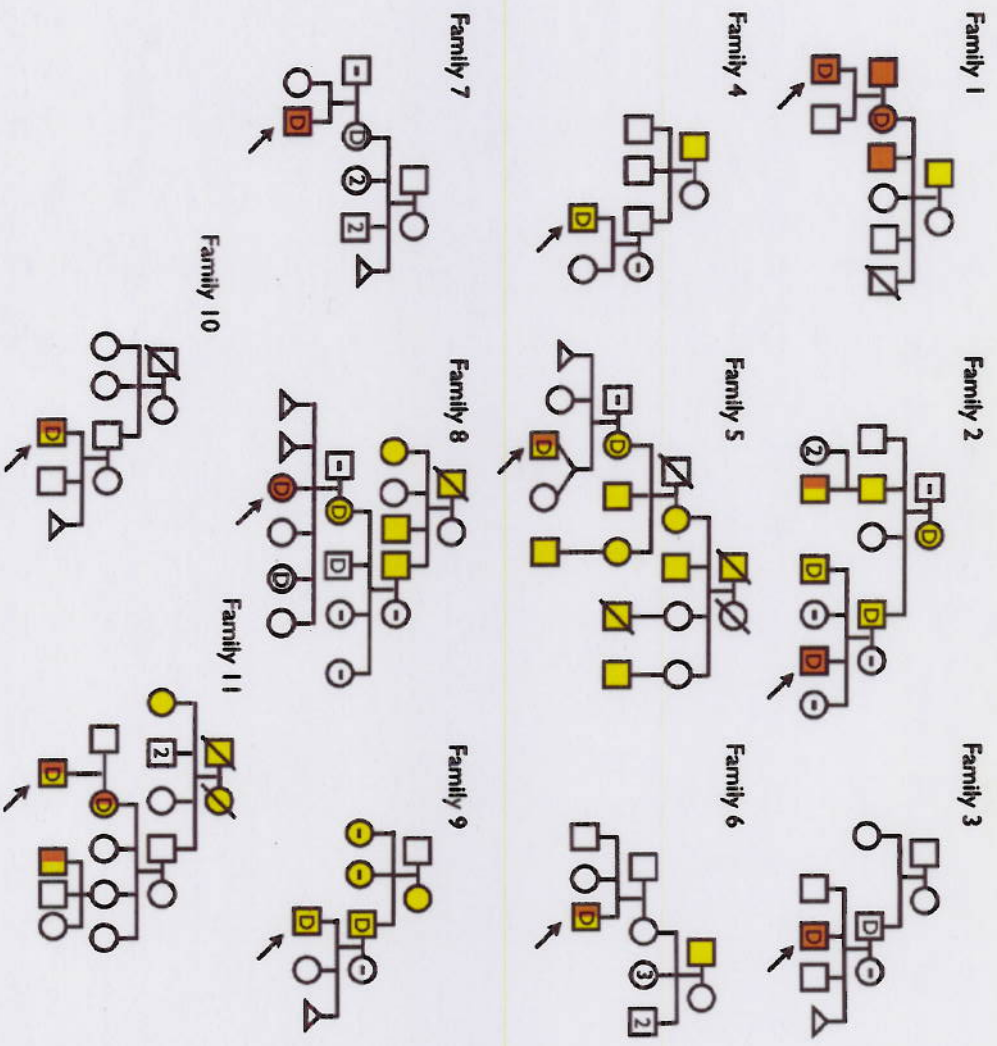

**Supp. Figure S3.** Pedigree analyses of eleven unrelated index patients with microduplication of *CHRNA7*. Index patients are marked with an arrow. "D" indicates duplication of *CHRNA7*, whereas "-" depicts the individual tested negative for the presence of a microduplication of *CHRNA7*. Orange color encodes for developmental delay/learning deficits/mental retardation. Yellow color encodes for neuropsychiatric phenotypes.

**Supp. Figure S3. Families**

**Family 1:** This 2-year-old Hispanic boy has significant speech delay and severe pica, eating large amounts of non-nutritive substances including dirt, soil and sheetrock. His mother who carries the duplication has learning deficits. Family history is significant for a maternal uncle with mild mental retardation and the maternal grandfather with depression, aggressive behaviors and rage attacks. **Family 2:** The index patient is a 3-year-old male with hypotonia, developmental delay, and intestinal pseudo-obstruction. His 5-year-old brother carrying the microduplication has been diagnosed with bipolar disorder. Their father, paternal uncle, and paternal grandmother have a history of depression. A paternal cousin has autism and displays aggressive behaviors. **Family 3:** The index patient presented with severe global developmental delay, hypotonia, and seizure disorder. There is no family history of neuro-psychiatric disease. **Family 4:** The index patient is a 3-year-old male with global developmental delay and hypotonia. Both parents are phenotypically normal. The paternal grandfather is nicotine dependent. **Family 5:** The propositus has autism spectrum disorder and global developmental delay. There is a strong family history of heavy alcohol use in the mother, maternal aunt, and maternal uncle and alcoholism in the maternal grandmother, great-uncle, and great-grandfather. A first cousin has ADHD, a first cousin once removed had major depressive disorder and committed suicide, another first cousin once removed had ADD. **Family 6:** This 6 year-old Hispanic boy has been diagnosed with autism spectrum disorder, mild mental retardation and anxiety disorder. His parents were unavailable for genetic testing. Family history was only significant for a maternal grandfather with epilepsy. **Family 7:** This boy of Vietnamese descent presented with global developmental delay and muscular hypotonia. There is no family history of neuro-psychiatric disease. **Family 8:** The 8-year-old index patient presented for evaluation of moderate mental retardation. Her mother as well as a maternal great-aunt have a history of depression. The maternal grandfather, maternal great-grandfather, and maternal great-uncle are alcoholics. These individuals are unavailable for genetic testing. **Family 9:** The 9-year-old propositus has autism spectrum disorder and mild mental retardation. His father, paternal grandmother, and two paternal aunts (the latter do not carry the microduplication of *CHRNA7*) have a history of major depressive disorder. **Family 10:** This 10-year old boy has been diagnosed with autism spectrum disorder, moderate mental retardation, and disruptive behavior disorder. His parents are currently unavailable for genetic testing. **Family 11:** The 12-year-old propositus had mild mental retardation, ADHD and bipolar disorder. His mother has ADHD, learning deficits, and major depressive disorder. A maternal great-aunt has bipolar disorder and anxiety disorder. The maternal great-grandmother has a history of depression, and the maternal great-grandfather is reported as physically violent. A maternal first cousin has ADHD, mental retardation, and epilepsy.

Supp. Table S1. Phenotypic features of 46 unrelated individuals with small microduplication of *CHRNA7*

| Patient | Indication                                       | Other CNVs Identified                                                          |
|---------|--------------------------------------------------|--------------------------------------------------------------------------------|
| 1       | Speech delay                                     |                                                                                |
| 2       | Feeding problem, FTT, Hypoglycemia               | arr 5p15.2(9021335-9243037)x3.nuc ish 5p15.2(RP11-109L5x3)                     |
| 3       | GDD                                              |                                                                                |
| 4       | GDD                                              | arr Xq25(123313165-123849841)x2.nuc ish Xq25(RP11-107O17x2)                    |
| 5       | Absent speech, GDD                               | arr 4q22.3(RP11-36916)x1.ish del(4)(q22.3q22.3)(RP11-36916delm)                |
| 6       | Encephalopathy NOS                               |                                                                                |
| 7       | GDD, Muscle weakness                             | arr 8q24.13q24.21(127185755-128672802)x1.ish del(8)(q24.13q24.13)(RP11-248A1-) |
| 8       | Encephalopathy                                   |                                                                                |
| 9       | Autism, speech disorder                          |                                                                                |
| 10      | Microcephalus, GDD, Micropennis                  |                                                                                |
| 11      | Mental retardation                               | arr 6q27(168458422-168622241)x3.nuc ish 6q27(RP11-673P11x3)                    |
| 12      | Mild DD/MR                                       |                                                                                |
| 13      | Moderate DD/MR                                   | arr 17q12(33025190 - 33278963)x3.nuc ish 17q12(RP11-87D17x3)                   |
| 15      | Encephalopathy, Autism, GDD                      |                                                                                |
| 17      | GDD                                              |                                                                                |
| 18      | Psychiatric diagnosis                            |                                                                                |
| 20      | Autism                                           |                                                                                |
| 21      | ADHA, Dysmorphic features                        |                                                                                |
| 23      | Mild DD/MR                                       |                                                                                |
| 24      | Conditions due to autosomal anomalies            |                                                                                |
| 25      | Moderate DD/MR, DF                               | arr 3q22.3(139610132-139871789)x3.nuc ish 3q22.3(RP11-946N8x3)                 |
| 27      | Down Syndrome, MCA                               | arr 8p23.3(305404-454943)x3.nuc ish 8p23.3(RP11-91J19x3)pat                    |
| 28      | GDD                                              |                                                                                |
| 31      | GDD                                              | arr 18p11.31p11.23(6932021-8064261)x3.nuc ish 18p11.31(RP11-781P6x3)           |
| 34      | Microcephaly                                     |                                                                                |
| 37      | GDD                                              | arr 22q13.33(49484191-49525470)x1.ish del(22)(q13.33q13.33)(n55a3-)            |
| 38      | Autistic Spectrum                                | arr 17q25.3(78459755-78586290)x3.nuc ish 17q25.3(RP11-629P20x3)                |
| 39      | Mild GDD/MR                                      |                                                                                |
| 42      | Child with chromosome abnormality                |                                                                                |
| 43      | Dysmorphic features                              | arr 5q21.2q21.3(103818165-104883348)x3.nuc ish 5q21.2(RP11-6N13x3)             |
| 44      | Multiple congenital anomalies, Pierre Robin Seq. |                                                                                |
| 46      | FM-X of chromosome abnormality                   |                                                                                |
| 48      | GDD                                              |                                                                                |
| 49      | DF, FTT, CMA                                     | arr 1q21.1(145085612-145858878)x1.ish del(1)(q21.1q21.1)(RP11-337C18-)         |
| 51      | Autism, GDD                                      | arr 1q43(236497263 - 236637233)x3.nuc ish 1q43(RP11-136B18x3)                  |
| 52      | GDD, Dysmorphic features, ADHD                   |                                                                                |
| 53      | Seizures                                         |                                                                                |
| 54      | Multiple congenital anomalies                    |                                                                                |
| 55      | Short stature, Speech delay, DF                  | arr 22q11.21(17447366-19779911)x1.ish del(22)(q11.21q11.21)(D22S75-)           |
| 58      | Limb anomaly, Radial ray defect                  |                                                                                |
| 59      | Multiple congenital anomalies                    |                                                                                |
| 60      | Encephalopathy                                   |                                                                                |
| 62      | Hydrocephalus                                    |                                                                                |
| 63      | Speech delay                                     |                                                                                |
| 64      | Moderate DD                                      |                                                                                |
| 68      | Abnormal ultrasound: hydrocephalus               |                                                                                |

Supp. Table S2. DNA sequences of the MLPA probes used for verification of the identified small microduplications

| Oligo Name                                     | Sequence 5' to 3'                                                                                                                                                          | Product Size bp |
|------------------------------------------------|----------------------------------------------------------------------------------------------------------------------------------------------------------------------------|-----------------|
| CHRNA7 Exon 2 LS<br>CHRNA7 Exon 2 RS           | GGGTTCCCTAAGGGTTGGATGCAAGGCGAGTTCACAGAGGAAGCTTTAC<br>AAGGAGCTGGTCAAGAACCTACAATCCCTTTCTAGATTGGATCTTGCTGGCAC                                                                 | 100             |
| CHRNA7 Exon 4 LS<br>CHRNA7 Exon 4 RS           | GGGTTCCCTAAGGGTTGGAGTCAAGAAATATCCAGGGGTGAAGACTGTTGGT<br>TTCCACAGATGGCCAGATTTGGAAACCAGACATCTAGATTGGATCTTGCTGGCAC                                                            | 104             |
| CHRNA7/FAM Exon 5 LS<br>CHRNA7/FAM Exon 5 RS   | GGGTTCCCTAAGGGTTGGAGATGAGCCGCTTTGACGCCACATTCACACTAACGTG<br>TTGGTAATTCCTTCTGGGCATGGCCAGTACCCTGCTTAGATTGGATCTTGCTGGCAC                                                       | 114             |
| CHRNA7/FAM Exon 10 LS<br>CHRNA7/FAM Exon 10 RS | GGGTTCCCTAAGGGTTGGAGTGTCTAATCCAGGACAGCATTTACAGCCACAACCTCCAG<br>TGTTCCCTCTGGCTGTCAAGTGTGTTGCTTACGGTTTTCTAGATTGGATCTTGCTGGCAC                                                | 118             |
| OTUD7A Exon 9 LS<br>OTUD7A Exon 9 RS           | GGGTTCCCTAAGGGTTGGATCCACGTTTTTGTCTCAGCCCATATATTAAGAAAGGCCCAT<br>CGTTGTTGTGGCAGATACAATGTTAAGAGACTCAGGTGATCTAGATTGGATCTTGCTGGCAC                                             | 122             |
| KLF13 Exon 2 LS<br>KLF13 Exon 2 RS             | GGGTTCCCTAAGGGTTGGATTTCTCCGTTGCCAGCAGAAAGGCATGCAGGACCCCTGTCACTACTAT<br>ACCTGGGCCCTGTATGGGAAATTTCTGGTCTTAAAAAGATGTTAGTCTAGATTGGATCTTGCTGGCAC                                | 134             |
| TRPM1 Exon 1 LS<br>TRPM1 Exon 1 RS             | GGGTTCCCTAAGGGTTGGATCCTCCATCTCATGTGTGAAGATTGGCAGCTGGAACCTCCCAAG<br>CTCTTAATATCTGTGCATGGAGGCCCTCAAGAACTTTGAGATGCAAGCCCTCTAGATTGGATCTTGCTGGCAC                               | 138             |
| MTMR10 Exon 14 LS<br>MTMR10 Exon 14 RS         | GGGTTCCCTAAGGGTTGGAGCTTCTCTTGTTCAGGTGATGCTGGATCCCTATTTTLAGACAATTACTGG<br>ATTTCAAGAGTCTGATACAGAAAGAGTGGGTCAATGGCAGGATATCAAGTTTCTAGATTGGATCTTGCTGGCAC                        | 142             |
| MTMR15 Exon 2 LS<br>MTMR15 Exon 2 RS           | GGGTTCCCTAAGGGTTGGATCTGCAGGATGACAGTTGCTTAAACAATGATATCCCTCAGCAGACATTCCTTTGGAG<br>CAGGGGCTCAAGCTGCAATGGTCTCTGTTCAAAACAACCCGGTCACTTACTACCCTCTAGATTGGATCTTGCTGGCAC             | 152             |
| ARHGAP11B Exon 1 LS<br>ARHGAP11B Exon 1 RS     | GGGTTCCCTAAGGGTTGGAGATTATCGACGTATCCGGAATGTGGGATCAGAGGCTGTTGAAGTTGGCCCTGTTGC<br>AGCATCTGCGGGGCTTCTATGGTATTAAAGTGAAGGGTGTCCGTGGGCAGTGGCATCTCTAGATTGGATCTTGCTGGCAC            | 156             |
| TJP1 Exon 12 LS<br>TJP1 Exon 12 RS             | GGGTTCCCTAAGGGTTGGATAATACGCCCGTGCCTTATCCGGAAGAGGGAGGTGTTCCGTTGTTGGATACCTTTGTACA<br>ATGGAACACTGGGCTCTTGGCTTTCATTCGATGAATGACGCCGACAGAAAGAACTGACTCTAGATTGGATCTTGCTGGCAC       | 160             |
| NDNL2 Exon 1 LS<br>NDNL2 Exon 1 RS             | GGGTTCCCTAAGGGTTGGATCGGTGAGACGTGGGAGGCGAAAAATGGCCGAAATTTCCGATCAAGCCGGGCCGACATTA<br>AAGCACGTCAATCGGGGACTACAAAGACATCTAACGTCGGGATGCTGAAAGTGAATGGCAGAGCTCTAGATTGGATCTTGCTGGCAC | 164             |
| APBA2 Exon 14 LS<br>APBA2 Exon 14 RS           | GGGTTCCCTAAGGGTTGGAGAGCGGAAGGAGCATTTATCAAGCCCGCTTCCGGCAGGCTTTTTTCCAGACTTAGGGTTTTT<br>CAATGTACTAATGACCACACCTGCTCTCTGACCCGTGTGGCTTACCTGACCCGCGGTATCGTCTAGATTGGATCTTGCTGGCAC  | 168             |

Supp. Table S3. Long-range PCR primers used to map the NAHR sites

| Patient       | NAHR site | Initial PCR amplification and DNA sequencing                                | DNA sequencing across the NAHR breakpoint                                   |
|---------------|-----------|-----------------------------------------------------------------------------|-----------------------------------------------------------------------------|
| 3,23,54       | 1         | 5'GCAGTGAAGAGGGTAGTGAMATGCTTTTAAAC<br>5'ATTCTCTCTCTCTCTCCACCACACCCTCAC      | 5'AAAGAGGCTTCTCACCOCAGTTCMAAATTGTTAC                                        |
| 38            | 1         | 5'GCAGTGAAGAGGGTAGTGAMATGCTTTTAAAC<br>5'ATTCTCTCTCTCTCTCCACCACACCCTCAC      | 5'AAAGAGGCTTCTCACCOCAGTTCMAAATTGTTAC<br>5'GAGTCAGAGCCATGAAAGATCCCATATTTTCTT |
| 55            | 2         | 5'CTCTGACTTCTGAGATTCTGGTAGAGAGGTTTCC<br>5'GTGGTGACCAGTGACTCTAATTTGTCGTAATTC | 5'AGTACTAGTCAITGTCCCTACTTGCCCTATGGT                                         |
| 29            | 3         | 5'CTCTGACTTCTGAGATTCTGGTAGAGAGGTTTCC<br>5'GTGGTGACCAGTGACTCTAATTTGTCGTAATTC | 5'CTTCTACTTGCTTTCAATTGCCCTAAGCACAAAC                                        |
| Del4          | 4         | 5'GGTGACCAGTGACTCTGTATTGTCGTAATTC<br>5'GTAAAGATCTGAAAGGCTGAAGTGCTTCTC       | 5'CTTGCAAAAACCTTACCCTGTTCTTCAAGTCAGTCC                                      |
| 29,55         | 5         | 5'CTCTGACTTCTGAGATTCTGGTAGAGAGGTTTCC<br>5'GTGGTGACCAGTGACTCTAATTTGTCGTAATTC | 5'AGAAACTCACATGAAGTTGCTGGTTAAGTGAC                                          |
| 13,29,55      | 6         | 5'CTCTGACTTCTGAGATTCTGGTAGAGAGGTTTCC<br>5'GTGGTGACCAGTGACTCTAATTTGTCGTAATTC | 5'AATTATACGTACTCCTGGATGGGGAAGCTGA<br>5'GCTCTACATTTAGGTTCAAAAACCCATCTGGAA    |
| 8,15,31,37,60 | 6         | 5'CTCTGACTTCTGAGATTCTGGTAGAGAGGTTTCC<br>5'GTGGTGACCAGTGACTCTAATTTGTCGTAATTC | 5'AGAAATTA AAAAGGAGAAACAGCCTTAGGAGAC                                        |
| 46            | 6         | 5'CTCTGACTTCTGAGATTCTGGTAGAGAGGTTTCC<br>5'GTGGTGACCAGTGACTCTAATTTGTCGTAATTC | 5'AGAAATTA AAAAGGAGAAACAGCCTTAGGAGAC                                        |
